# Supplementary material for: Infection with a Brazilian isolate of Zika virus generates RIG‐I stimulatory RNA and the viral NS5 protein blocks type I IFN induction and signaling
Source: PubMed Central journal article supplement (PMC6055886; doi:10.1002/eji.201847483), 2018-04-06
Supplement: EJI-48-1120-s001.pdf [file EJI-48-1120-s001.pdf]

# European Journal of Immunology

Supporting Information

for

**DOI 10.1002/eji.201847483**

Jonny Hertzog, Antonio Gregorio Dias Junior, Rachel E. Rigby, Claire L. Donald,  
Alice Mayer, Erdinc Sezgin, Chaojun Song, Boquan Jin, Philip Hublitz,  
Christian Eggeling, Alain Kohl and Jan Rehwinkel

**Infection with a Brazilian isolate of Zika virus generates RIG-I stimulatory RNA  
and the viral NS5 protein blocks type I IFN induction and signaling**

## **Supplementary Information**

# **Infection with a Brazilian isolate of Zika virus generates RIG-I stimulatory RNA and the viral NS5 protein blocks type I IFN induction and signalling**

Jonny Hertzog, Antonio Gregorio Dias Junior, Rachel E. Rigby, Claire L. Donald, Alice Mayer, Erdinc Sezgin, Chaojun Song, Boquan Jin, Philip Hublitz, Christian Eggeling, Alain Kohl and Jan Rehwinkel

# Supplementary Figure 1

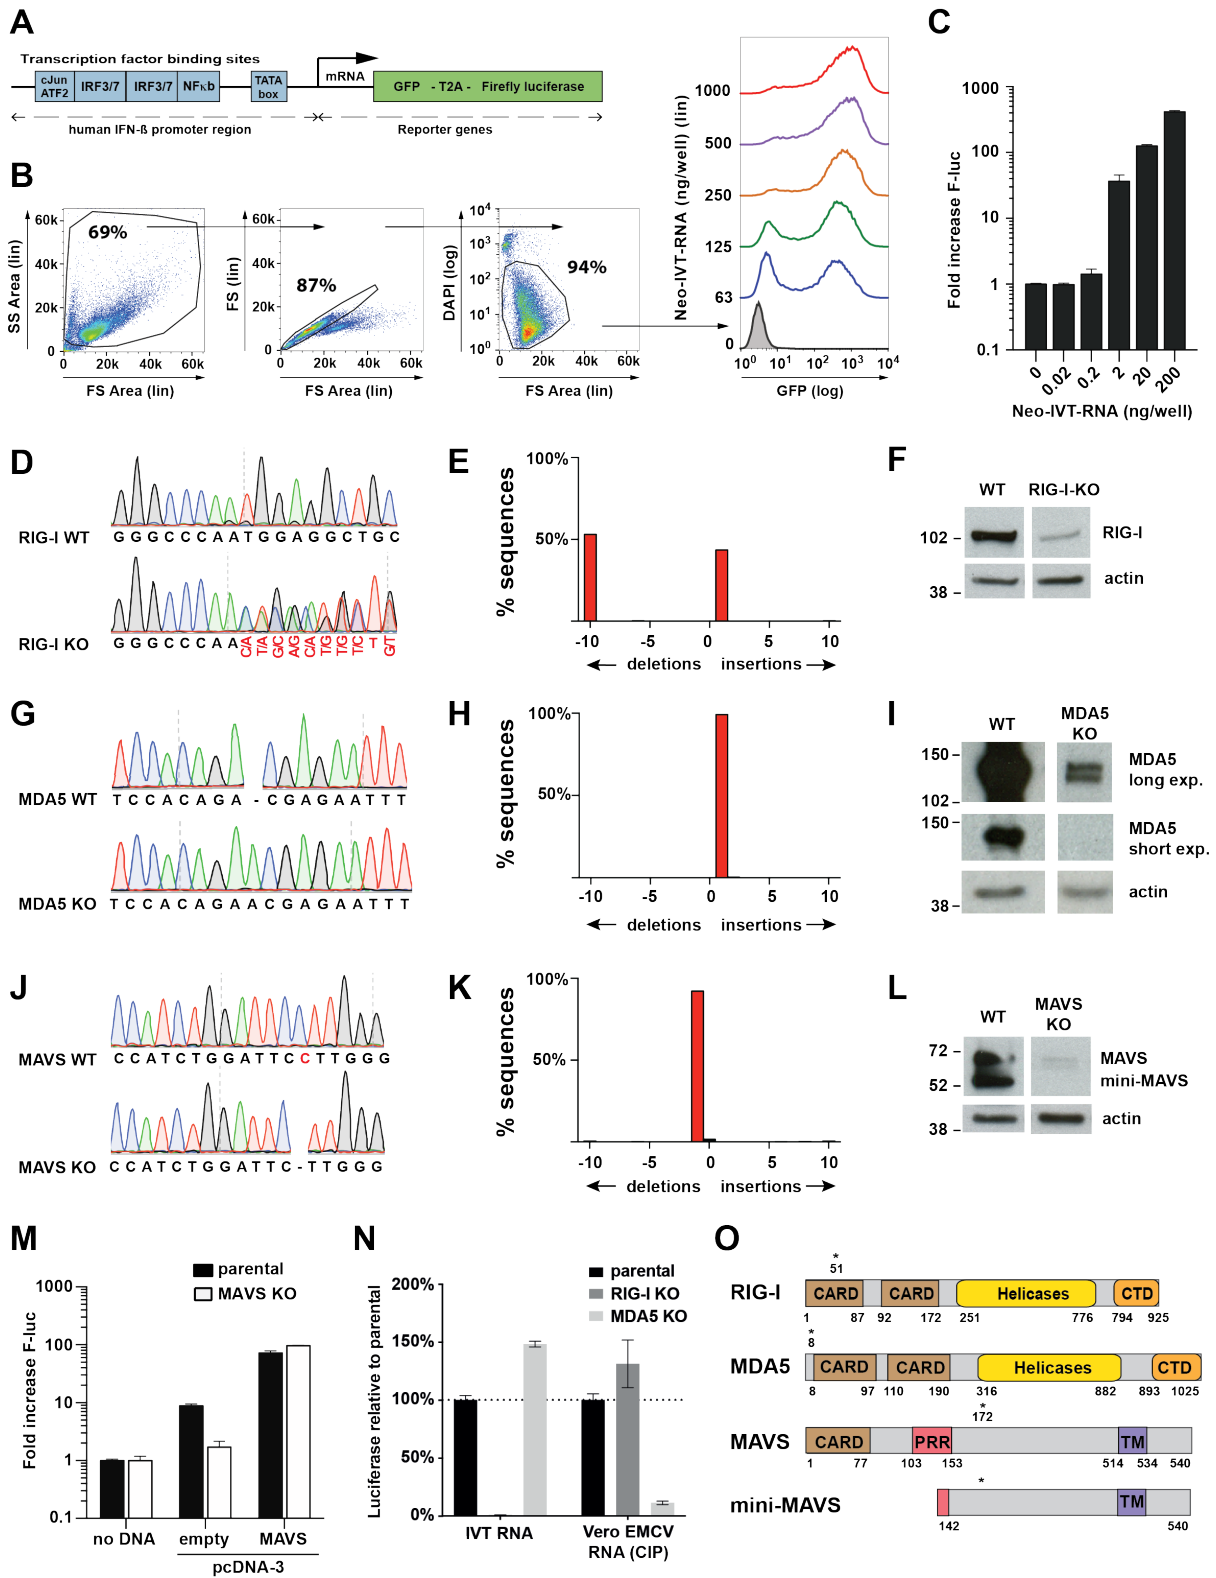

**Fig. S1. Generation of RLR reporter cell lines.**

(A) *IFN $\beta$*  reporter construct used to generate the reporter cell line. This construct co-expresses copGFP and F-Luc, linked by a self-cleaving T2A peptide, under the control of the human *IFN $\beta$*  promoter region.

(B) HEK cells stably transduced with the construct described in (A) - and hereafter referred to as p125-HEK cells - were seeded in a 24-well plate one day before transfection with graded doses of IVT-RNA. Cells were harvested 24 hours post transfection and expression of GFP was assessed by flow cytometry (gated on DAPI negative, single cells).

(C) p125-HEK cells were seeded in 96-well plates one day before transfection with graded doses of Neo<sup>1-99</sup> IVT-RNA. F-Luc activity in cell lysates was determined 24 hours after transfection. Data are shown as fold change compared to cells treated with transfection reagent only.

(D - O) p125-HEK clones knocked out for RIG-I, MDA-5 and MAVS were generated using CRISPR technology.

(D, G, J) Genomic DNA was extracted from RIG-I KO (D), MDA5 KO (G) and MAVS KO (J) p125-HEK cells and from parental cells. A fragment of DNA surrounding the targeted area was amplified by PCR, gel purified and sequenced. Superposition of peaks in the RIG-I KO clone sequence indicates that different alleles bear different mutations.

(E, H, K) Sequences generated in (D), (G) and (J) were analyzed with TIDE software. This algorithm decomposes the sequencing data to determine the spectrum of indels and their frequencies. The graphs show the number of nucleotides inserted or deleted and percentage of sequences affected. One nucleotide was inserted into one allele of the *RIG-I* gene, inducing a frameshift and therefore a modification of the amino acid sequence from position 51, potentially giving rise to a protein containing 86 aa. In the second allele, 10 nucleotides were deleted, also inducing a modification of the amino acid sequence from position 51 and

potentially giving rise to a protein containing 73 aa. The insertion of one nucleotide into the *IFH11* gene (encoding MDA5) creates a frameshift at position 8, potentially giving rise to a protein containing 58 aa. In the case of MAVS, the deletion of one nucleotide induced a frameshift and therefore a different amino acid sequence from position 172, potentially giving rise to a protein containing 189 aa.

(F,L) p125-HEK cells of the indicated genotype were treated with 140 U/ml of IFN $\alpha$  overnight, then lysed in a buffer containing 1% of NP-40. Protein expression was tested by Western blot using the indicated antibodies.

(I) MDA5 KO and WT p125-HEK cells were infected overnight with Sendai virus at an MOI of 0.5, then lysed in a buffer containing 0.5% of NP40. MDA5 and actin expression were analyzed by Western blot.

(M) MAVS KO and WT p125-HEK cells were treated with 200 U/ml of IFN $\alpha$  overnight, before transfection with 100ng per well of pcDNA3 plasmid expressing human MAVS or an empty pcDNA3 vector as control. F-Luc activity in cell lysates was determined 24 hours after transfection. Data are shown as fold change compared to cells treated with transfection reagent only.

(N) RIG-I KO, MDA5 KO, and parental p125-HEK cells were transfected with 25 ng of IVT RNA or Vero EMCV RNA (CIP). F-Luc activity in cell lysates was determined 24 hours after transfection. Data are shown as luciferase values relative to parental p125-HEK.

(O) Schematic representation of RIG-I, MDA5 and MAVS proteins. The star indicates the position targeted by the sgRNA.

Panels (B) - (M) are representative of two or more independent experiments. Panels (C) and (M) show average and SD (n=3). Panel (N) shows pooled data from two independent experiments (average and SEM (n=4)).

## Supplementary Figure 2

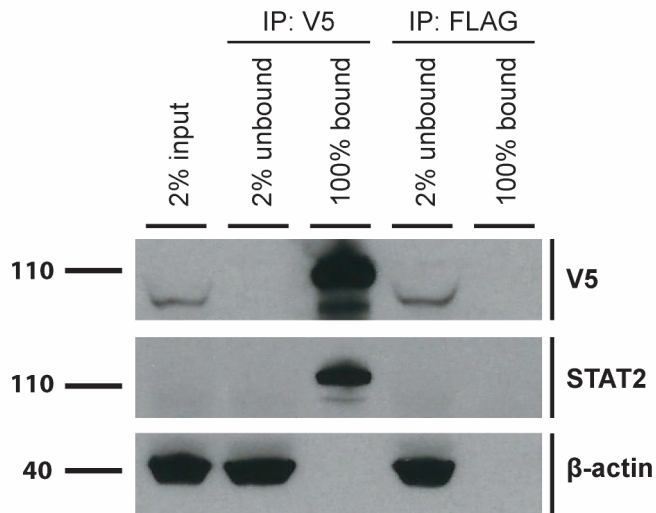

**Fig. S2. ZIKV NS5 binds STAT2.**

HEK293T cells were transfected with a plasmid expressing ZIKV NS5-V5. 24 hours later, cells were lysed and NS5 was immunoprecipitated with  $\alpha$ -V5 antibody. As a negative control,  $\alpha$ -FLAG antibody was used. Input, unbound and bound fractions were analyzed by Western blot using the indicated antibodies. Data are representative of three independent experiments.

## Supplemental Table 1. Oligonucleotides.

| Name                                               | Purpose                                  | Sequence                                                                                                              |
|----------------------------------------------------|------------------------------------------|-----------------------------------------------------------------------------------------------------------------------|
| 751_2K-NS4B_f                                      | Cloning of 2K-NS4B                       | AGGAGGACAGCTATGTCTCCCCAGGACAACCA<br>AATGGCAATCATCATCATGGTAGCAGTAGGTC<br>TTCTGGGCTTGATTACCGCCAATGAACTCGGA<br>TGGTTGGAG |
| 734_2K-NS4B_r                                      | Cloning of 2K-NS4B                       | ACGTCTCTTGACCAAGCCAG                                                                                                  |
| 749_NS4A_f                                         | Cloning of NS4A                          | AGGAGGACAGCTATGGGAGCGGCTTTTGGAGT<br>G                                                                                 |
| 750_NS4A_r                                         | Cloning of NS4A                          | TCTTTGCTTTTCTGGCTCAGG                                                                                                 |
| 753_NS4A-2K-NS4B_f                                 | Cloning of NS4A-2K-NS4B<br>(overlap PCR) | GGCGGTAATCAAGCCCAGAAG                                                                                                 |
| 754_NS4A-2K-NS4B_f2                                | Cloning of NS4A-2K-NS4B<br>(overlap PCR) | GGCAATCATCATCATGGTAGCAGTAGGTCTTC<br>TGGGCTTGATTACCGCCAATGAACTCGGATGG<br>TTGGAGAG                                      |
| 779_NS2B-NS3_r1                                    | Cloning of NS2B-NS3<br>(overlap PCR)     | CAGGCACATCCCATAGAGCACCCTCCTTTTT<br>CCAGTCTTCACGTATACGTA                                                               |
| 780_NS2B-NS3_f2                                    | Cloning of NS2B-NS3<br>(overlap PCR)     | CGTGGTACGTATACGTGAAGACTGGAAAAAG<br>GAGTGGTGTCTCTATGGGATGTGCCTG                                                        |
| 781_NS2B-NS3_r2                                    | Cloning of NS2B-NS3<br>(overlap PCR)     | TCTTTTCCCAGCGGCAAACCTCCTTG                                                                                            |
| 797_NS2B-NS3_f1                                    | Cloning of NS2B-NS3<br>(overlap PCR)     | AGGAGGACAGCTATGAGCTGGCC                                                                                               |
| 783_NS5-eYFP_r1                                    | Cloning of NS5-eYFP<br>(overlap PCR)     | GCGGCCGCCACTGTGCTGGATATCAACCACTT<br>TGTACAAGAAAGCTGGGTCGAATTCGCCCTCA<br>GCACTCCAGGTGTAGACCCCTTCTTC                    |
| 784_NS5-eYFP_f2                                    | Cloning of NS5-eYFP<br>(overlap PCR)     | TTCTTGTACAAAGTGGTTGATATCCAGCACAG<br>TGGCGGCCGCTCGAGTCTAGAGGGCCGCGGT<br>TCGAAGTGAGCAAGGGCGAGGAGCTG                     |
| 785_NS5-eYFP_r2                                    | Cloning of NS5-eYFP<br>(overlap PCR)     | CAGCTCGTCCATGCCGAGAGTG                                                                                                |
| 786_NS5-eYFP_f1                                    | Cloning of NS5-eYFP<br>(overlap PCR)     | AGGAGGACAGCTATGGGGGGTG                                                                                                |
| aNLS mutant – Cluster 1<br>(KHK to AA) Fwd         | NS5 NLS mutagenesis PCR                  | cctggtgtggaagagctaggcgcagccgcacggccacgagtctgtacc<br>aaag                                                              |
| aNLS mutant – Cluster 1<br>(KHK to AA) Rev         | NS5 NLS mutagenesis PCR                  | ctttgtacagactcgtggccgtgaggctgcctagctctttccacaaccag<br>g                                                               |
| aNLS mutant – Cluster 2<br>(RQ to AA) Fwd          | NS5 NLS mutagenesis PCR                  | ccagacccccagaaggcactgctgagggtatgagcatggtc                                                                             |
| aNLS mutant – Cluster 2<br>(RQ to AA) Rev          | NS5 NLS mutagenesis PCR                  | gaccatgctcataaccgcagcagtgctctttgggggtctgg                                                                             |
| 2-O <sup>'</sup> methyltransferase<br>mutant - Fwd | NS5 E218A cap1<br>mutagenesis PCR        | ccgcaactctacacatgcatgtactgggtctctg                                                                                    |
| 2-O <sup>'</sup> methyltransferase<br>mutant - Rev | NS5 E218A cap1<br>mutagenesis PCR        | cagagaccagttacatcgcatgttagagttgagg                                                                                    |
| NS5 M2634V F                                       | Cloning of NS5 “African<br>mutant”       | atagctttgcaccaacatgggtcttcatgaccag                                                                                    |
| NS5 M2634V R                                       | Cloning of NS5 “African<br>mutant”       | ctggtcatgaagaacctgttgggtgcaaagctat                                                                                    |
| NS5 M3392V F                                       | Cloning of NS5 “African<br>mutant”       | cacctatgctcctgcatcatgttactgtgtttta                                                                                    |
| NS5 M3392V R                                       | Cloning of NS5 “African<br>mutant”       | taaaaacacagtcaacatgatgagcaggatcatagggtg                                                                               |
| RIG-I sgRNA Fwd                                    | Cloning of RIG-I sgRNA                   | CACCGgaacaacaaggcccaatgg                                                                                              |
| RIG-I sgRNA Rev                                    | Cloning of RIG-I sgRNA                   | AAACccattggcccttgtttgttcC                                                                                             |
| MAVS sgRNA Fwd                                     | Cloning of MAVS sgRNA                    | CACCGgcccaccatctggattcctt                                                                                             |
| MAVS sgRNA Rev                                     | Cloning of MAVS sgRNA                    | AAACaaggaaatccagatggtggcc                                                                                             |

|                              |                               |                          |
|------------------------------|-------------------------------|--------------------------|
| MDA-5 sgRNA Fwd              | Cloning of MDA5 sgRNA         | CACCGtagcggaaattctcgtctg |
| MDA-5 sgRNA Rev              | Cloning of MDA5 sgRNA         | AAACcagacgagaatttccgctaC |
| RIG-I KO gDNA sequencing Fwd | Validation of RIG-I targeting | ttacattgtctcagactaagaggc |
| RIG-I KO gDNA sequencing Rev | Validation of RIG-I targeting | Gtgaagaatgggcacagtcggcc  |
| MAVS KO gDNA sequencing Fwd  | Validation of MAVS targeting  | Ggctgaggcctataggagatgcc  |
| MAVS KO gDNA sequencing Rev  | Validation of MAVS targeting  | gcctgaccacaggatcatatgc   |
| MDA5 KO gDNA sequencing Fwd  | Validation of MDA5 targeting  | cgtcattgtcaggcacagag     |
| MDA5 KO gDNA sequencing Rev  | Validation of MDA5 targeting  | agctctgccactgttttcc      |
| IAV PR8 M F                  | RT-qPCR                       | CTTCTAACCGAGGTCGAAACGTA  |
| IAV PR8 M R                  | RT-qPCR                       | GGTGACAGGATTGGTCTTGCTTTA |
| ZIKV PE243 F                 | RT-qPCR                       | CGAGGAACATCCAGACTC       |
| ZIKV PE243 R                 | RT-qPCR                       | ATTGGAGATCCTGAAGTTCC     |
